# Supplementary material for: A new dominant peroxiredoxin allele identified by whole-genome re-sequencing of random mutagenized yeast causes oxidant-resistance and premature aging
Source: publisher site journal article supplement (doi:10.18632/aging.100187), 2010-08-13

## Supplementary figure 1: coverage uniformity

The 16 yeast chromosomes were split into virtual 1kb units, and we calculated the average coverage for each of these units. These numbers are shown aligned to the Reference genome.

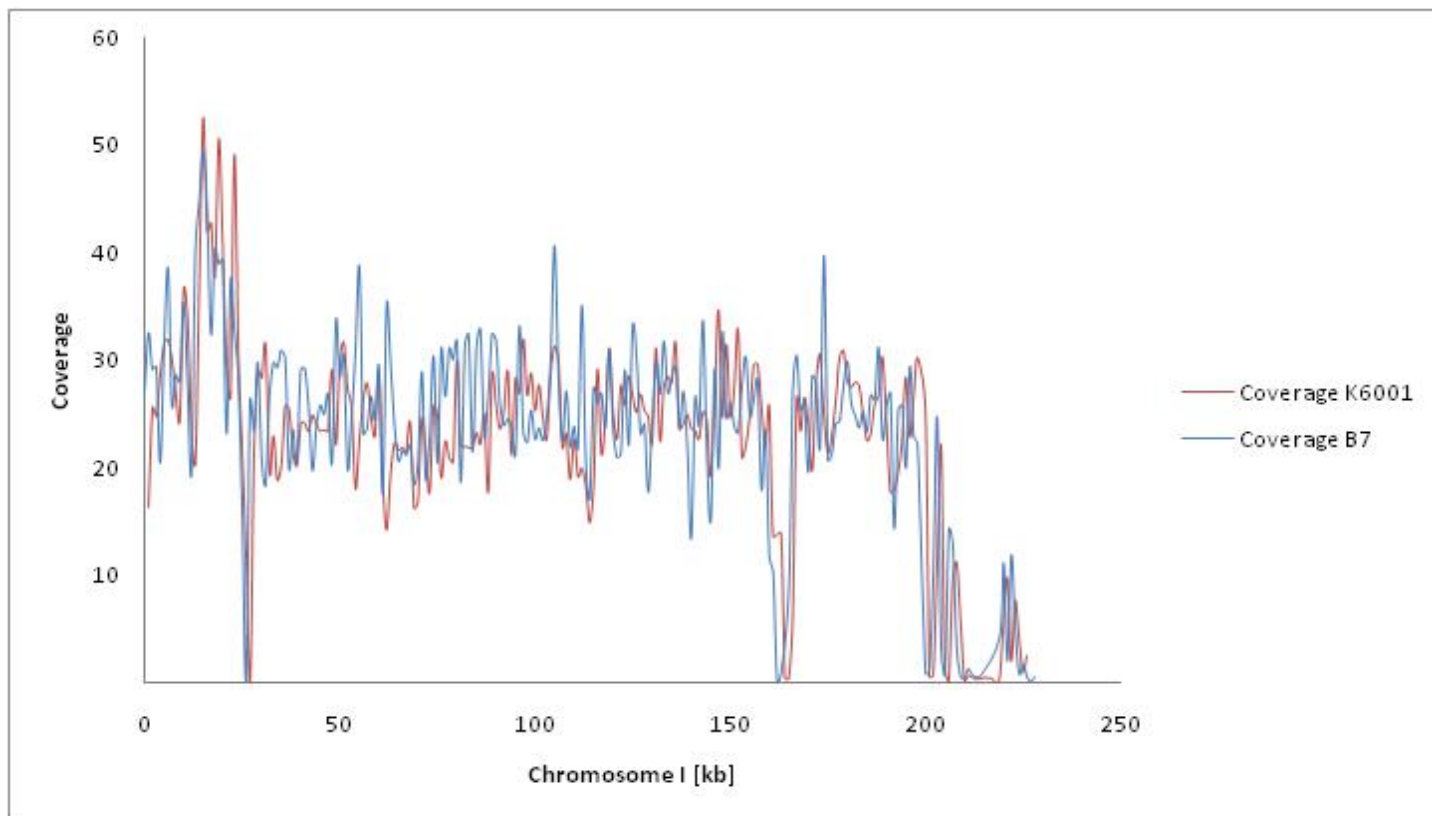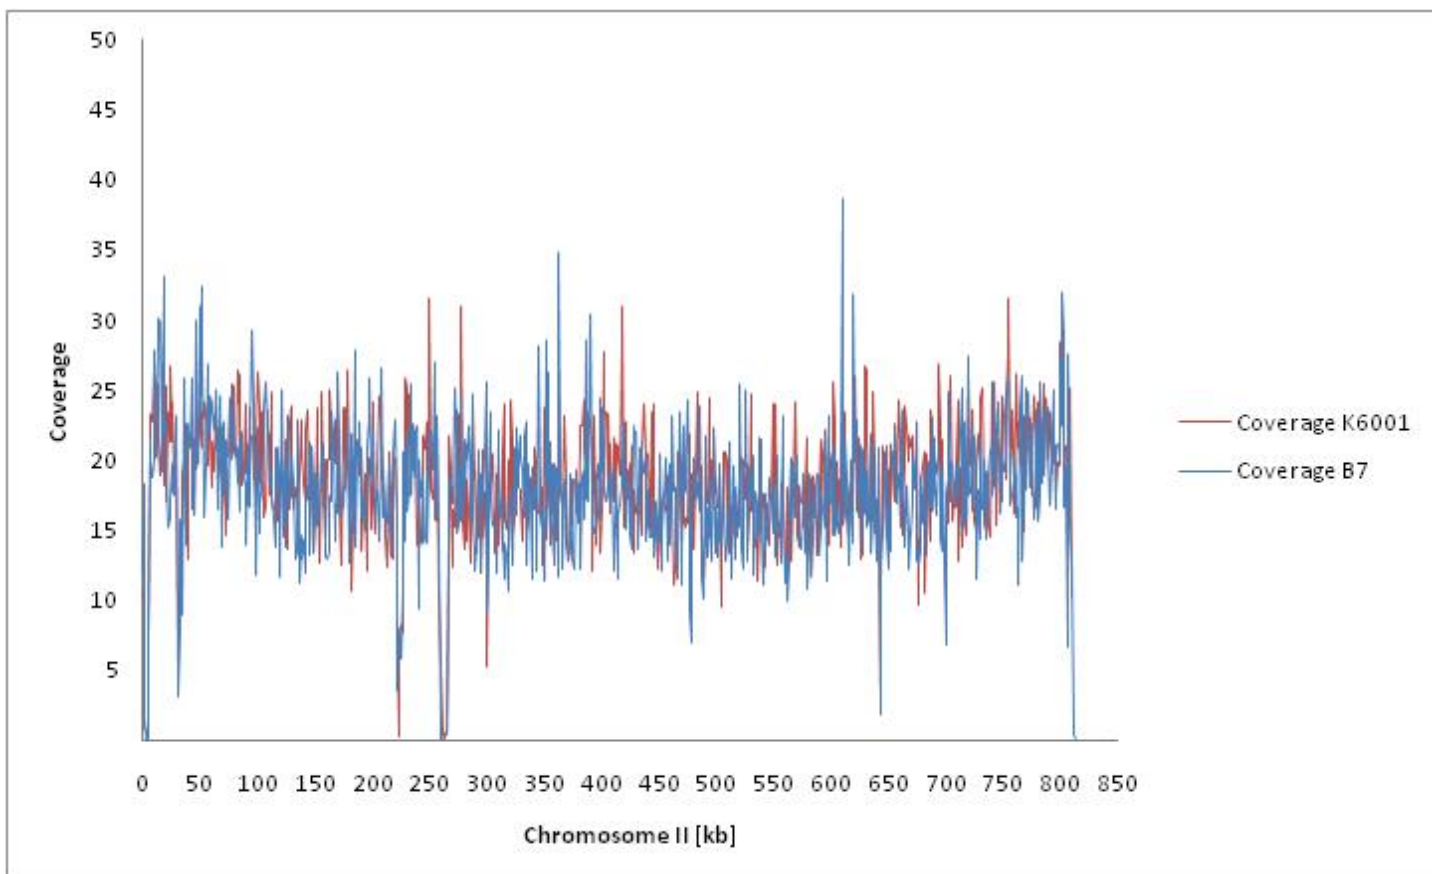

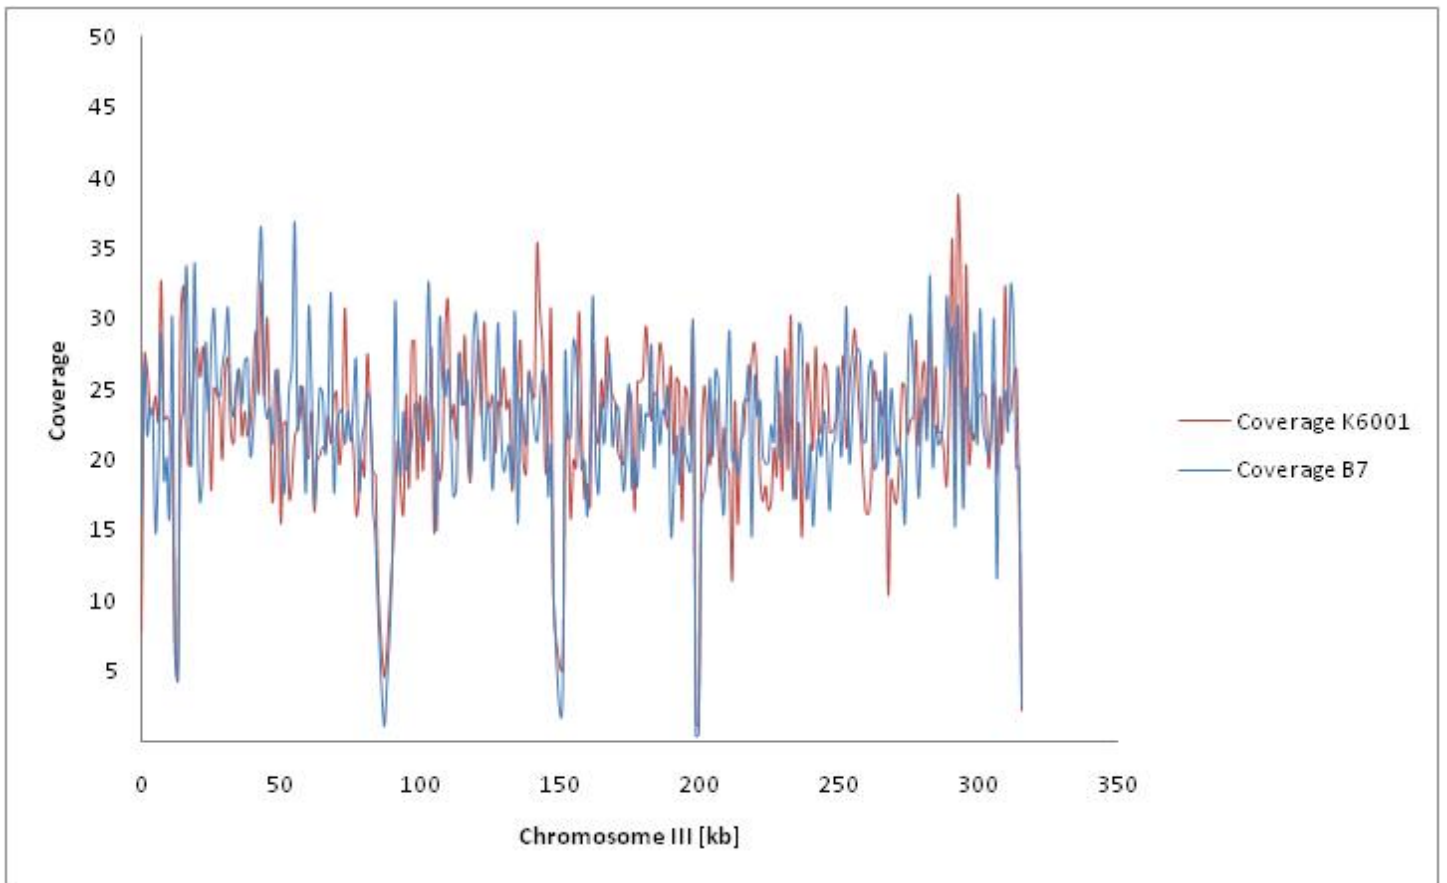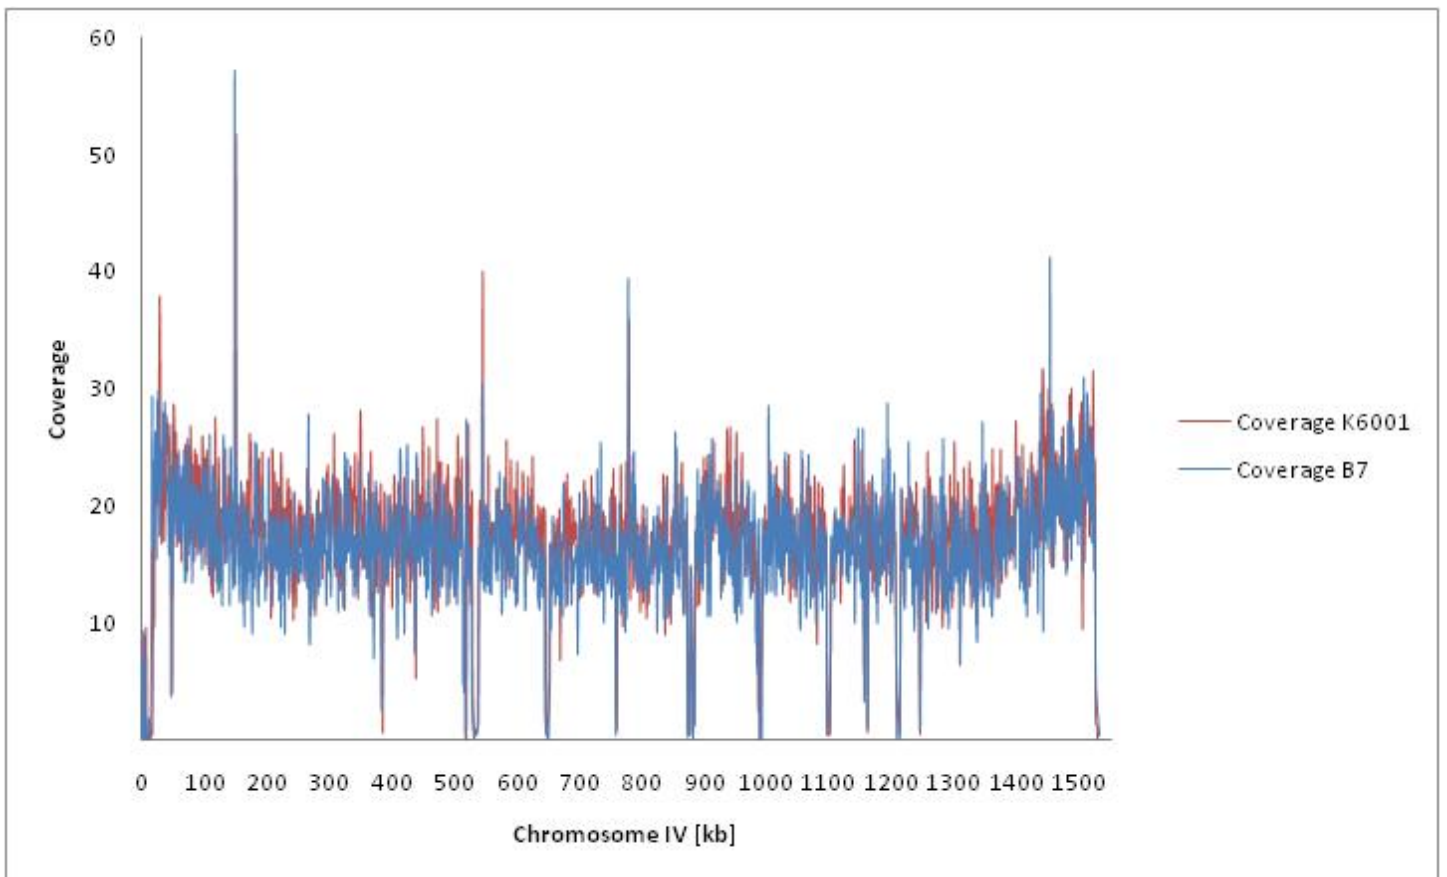

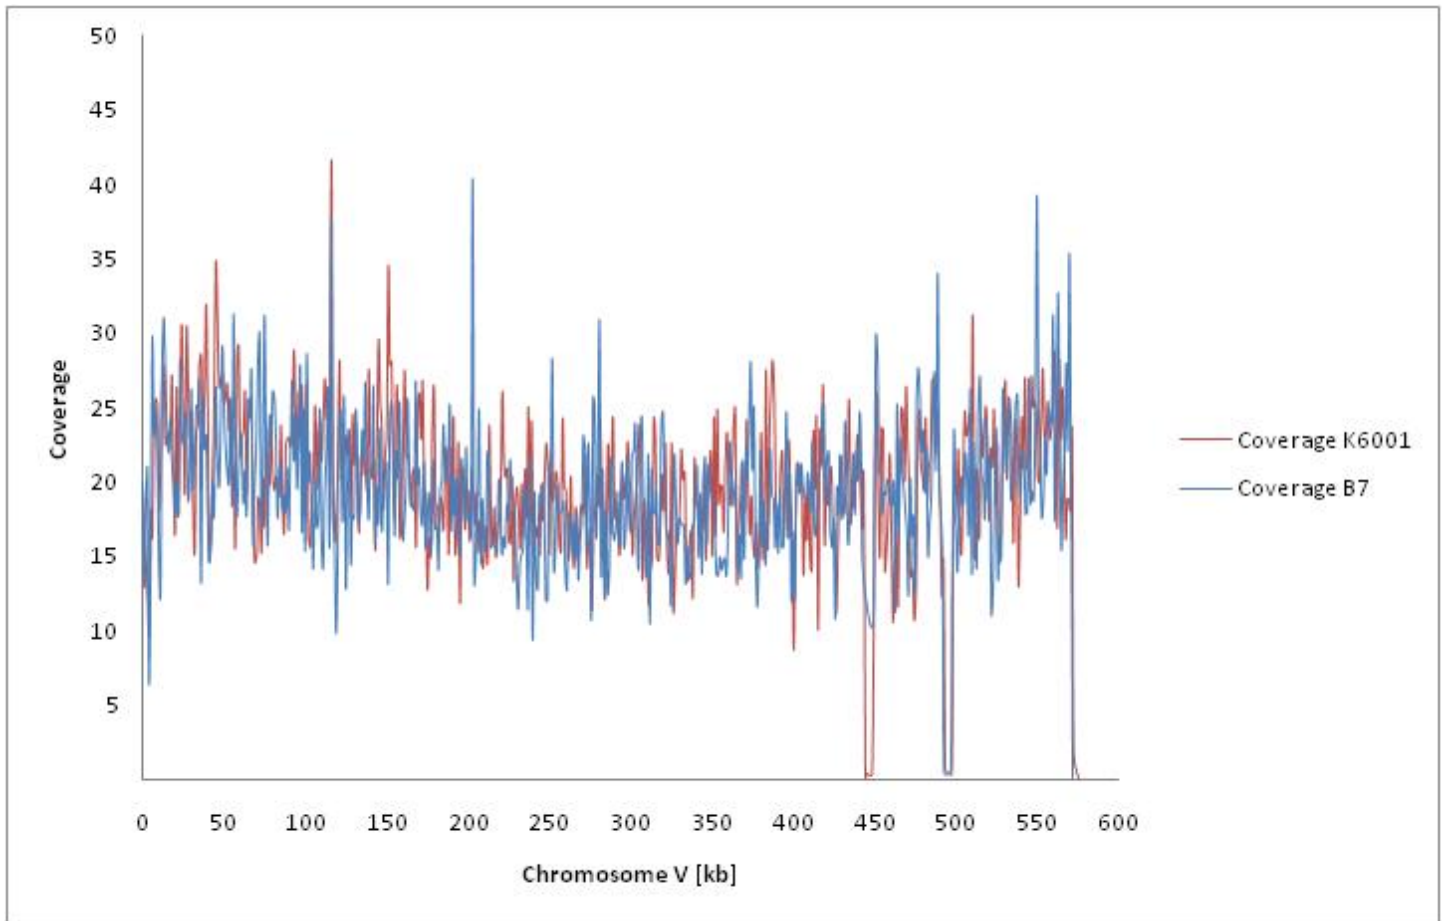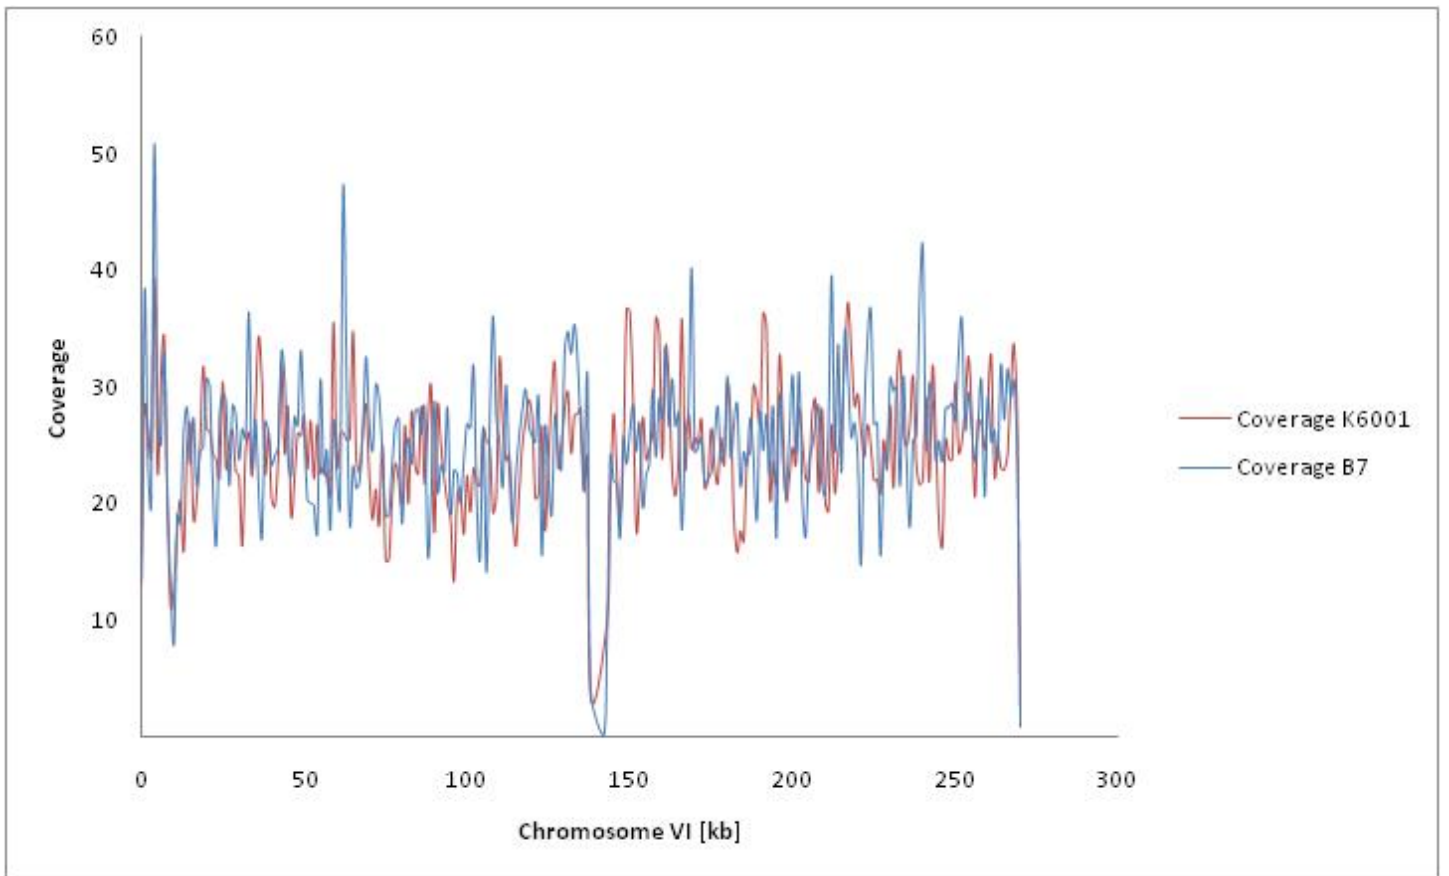

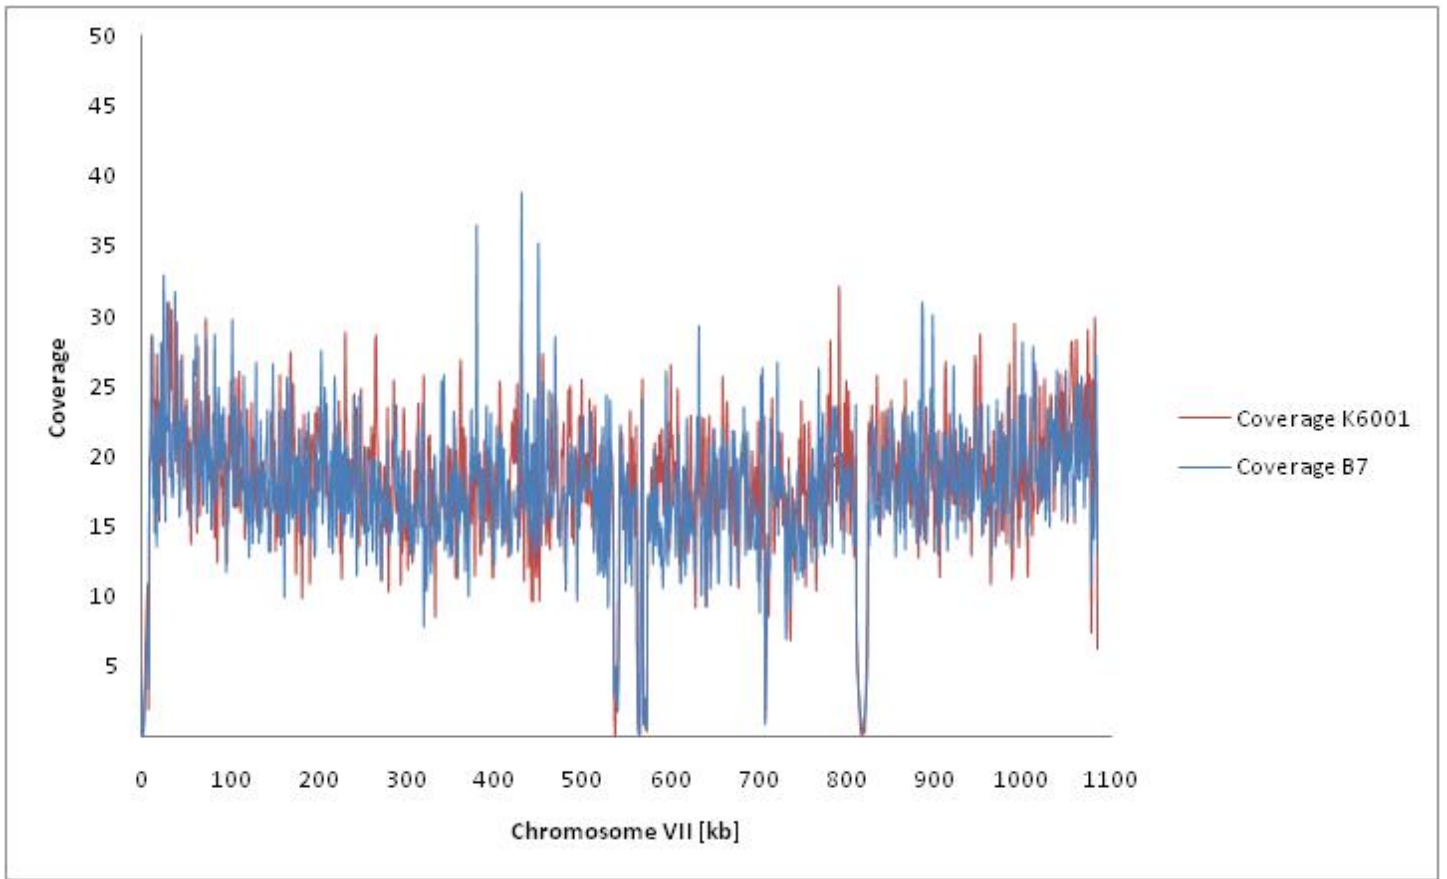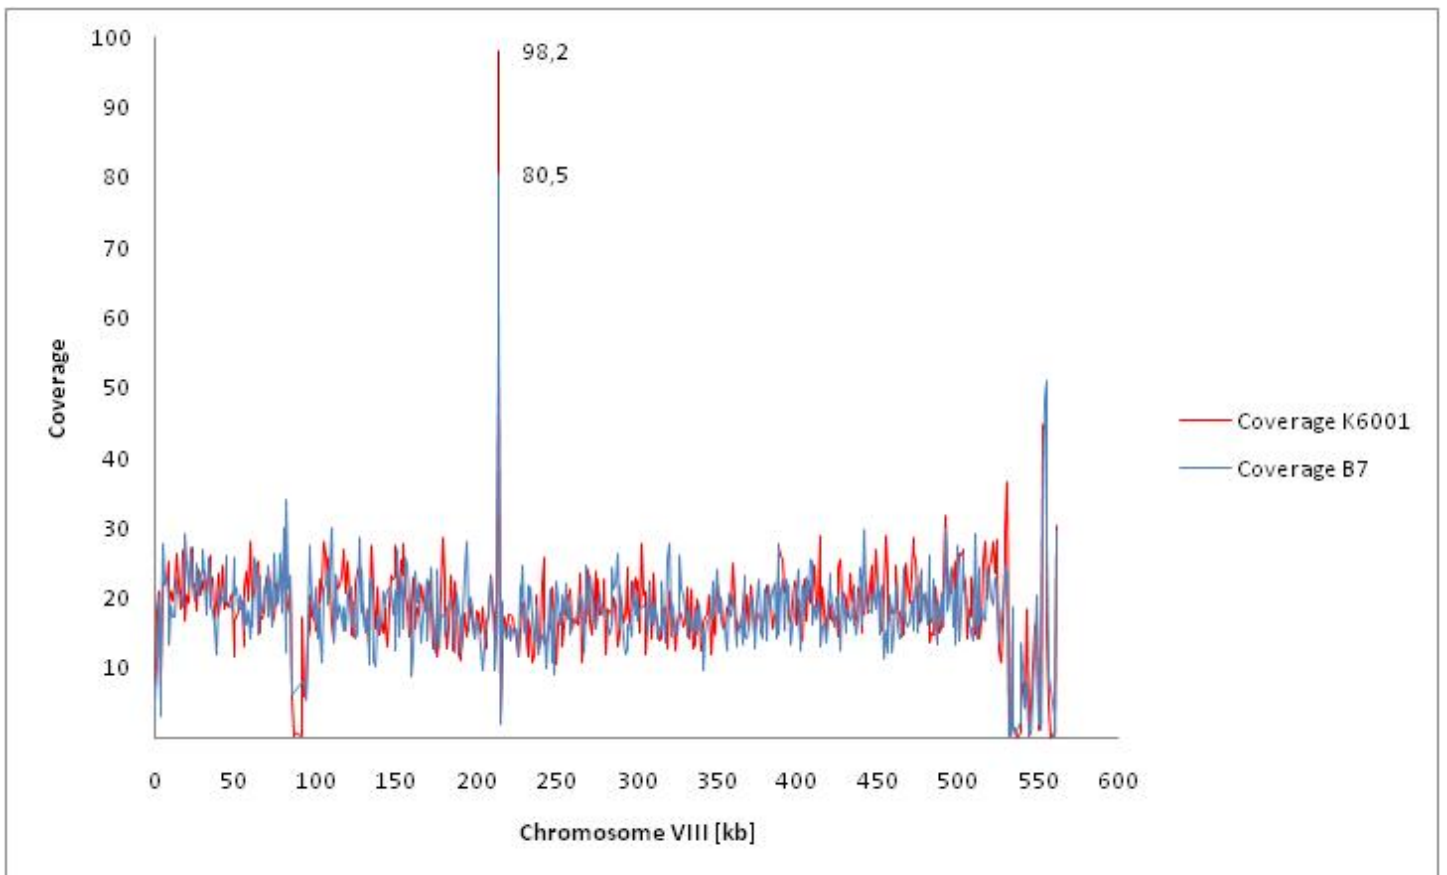

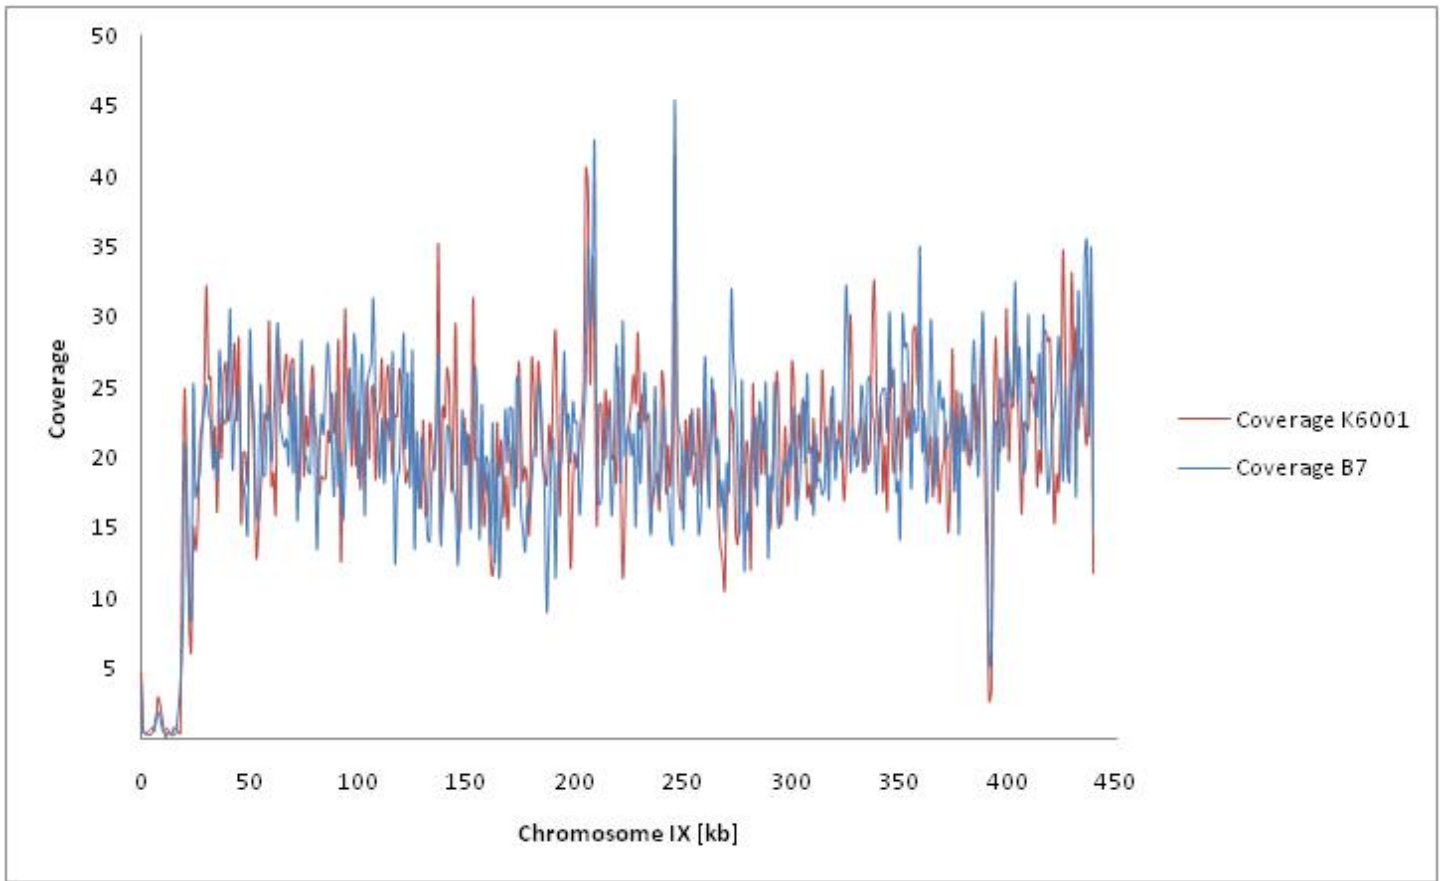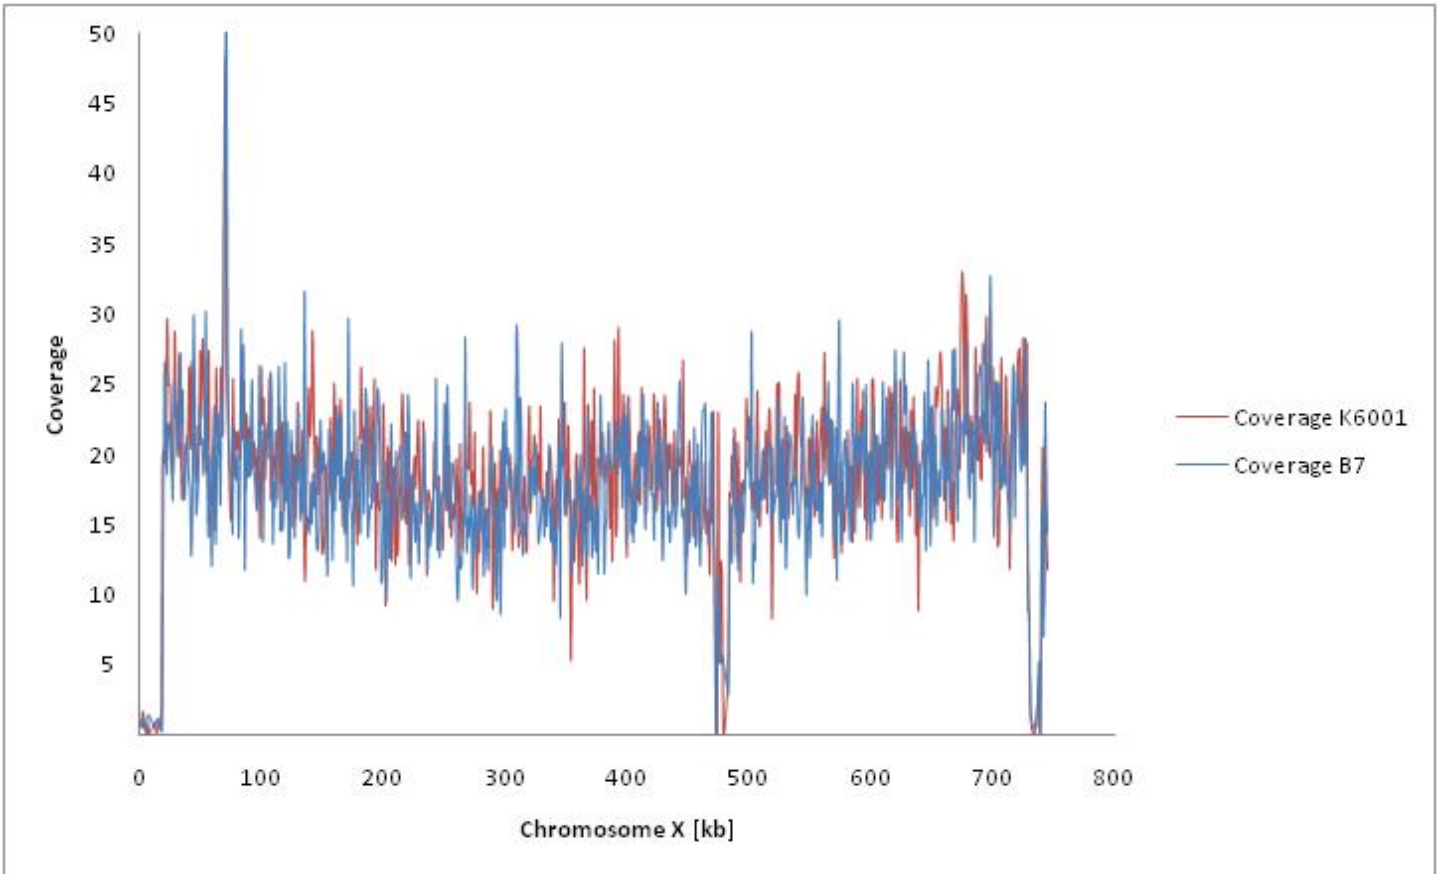



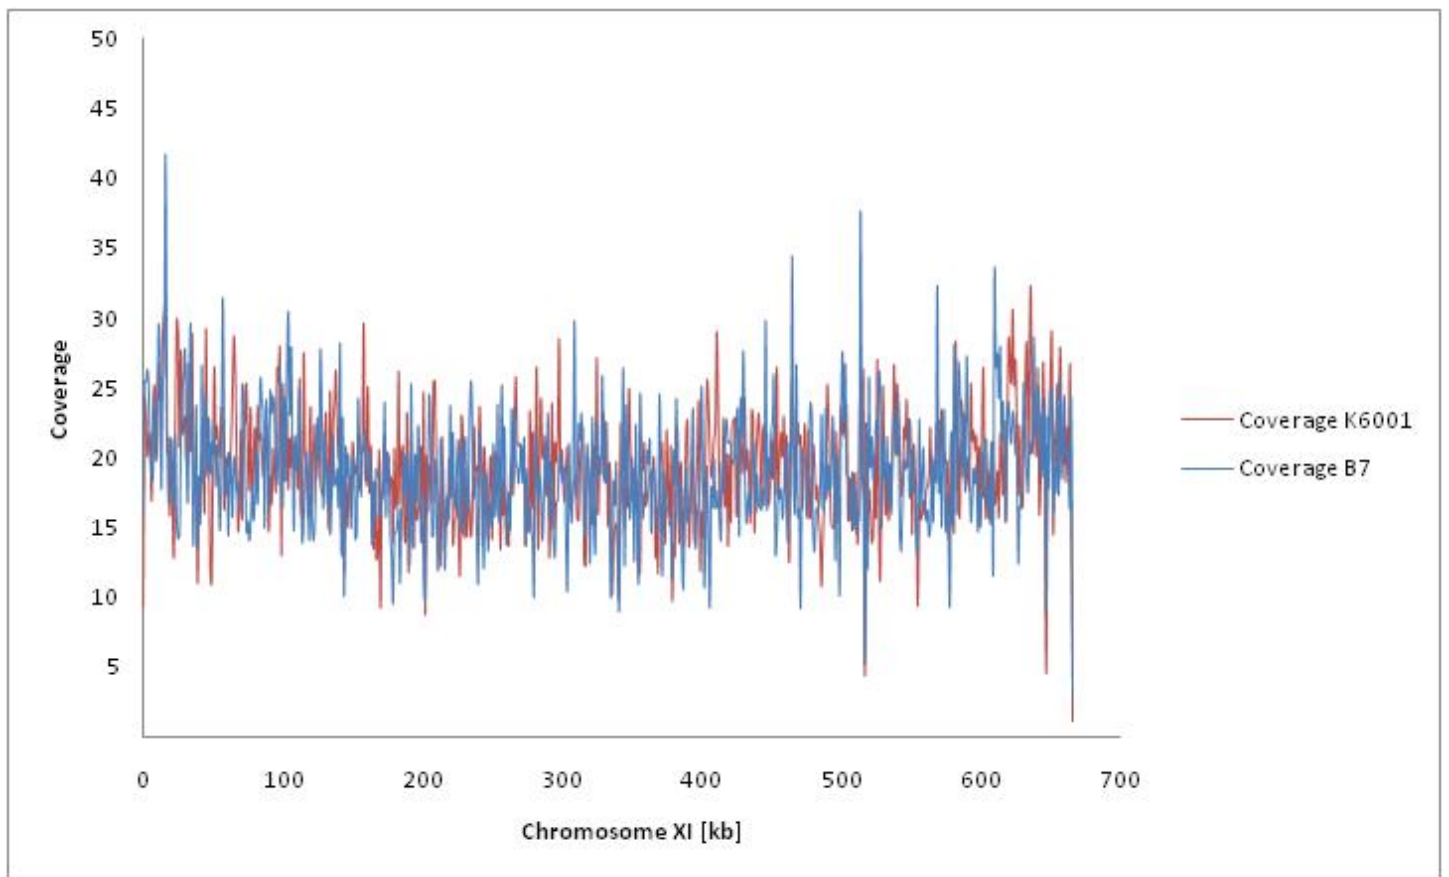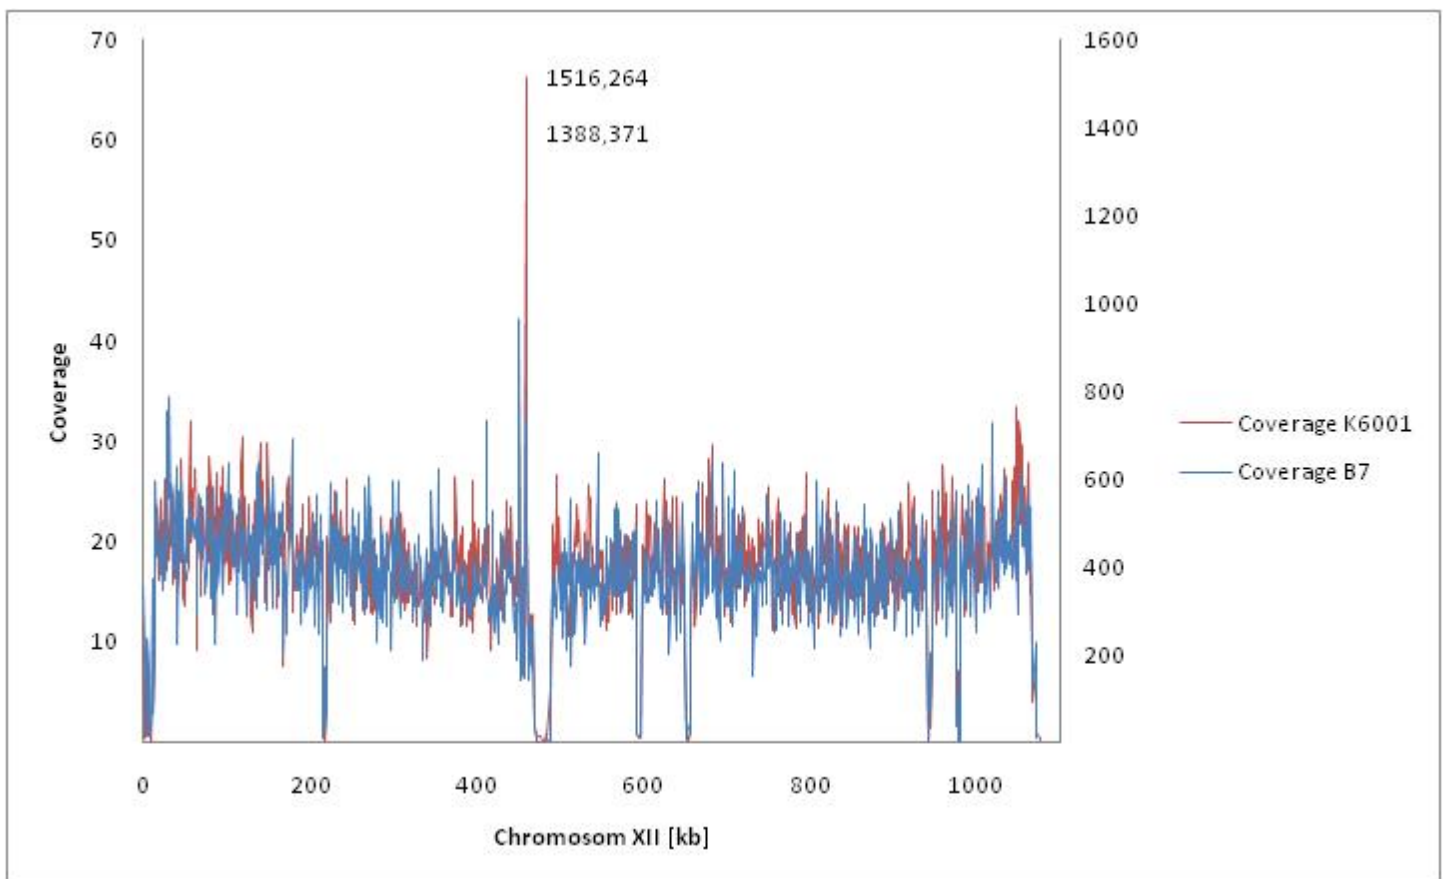

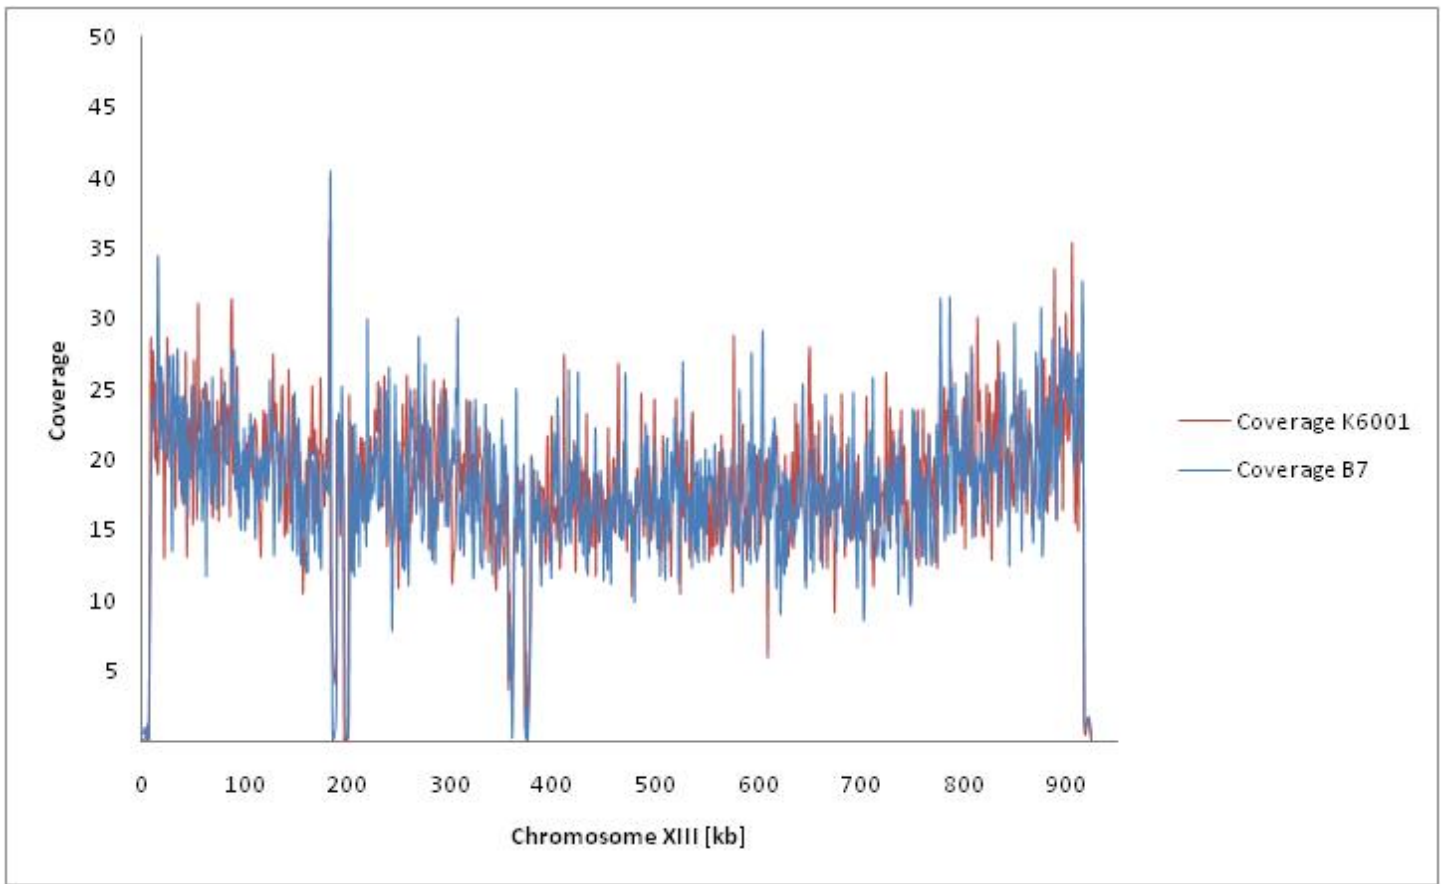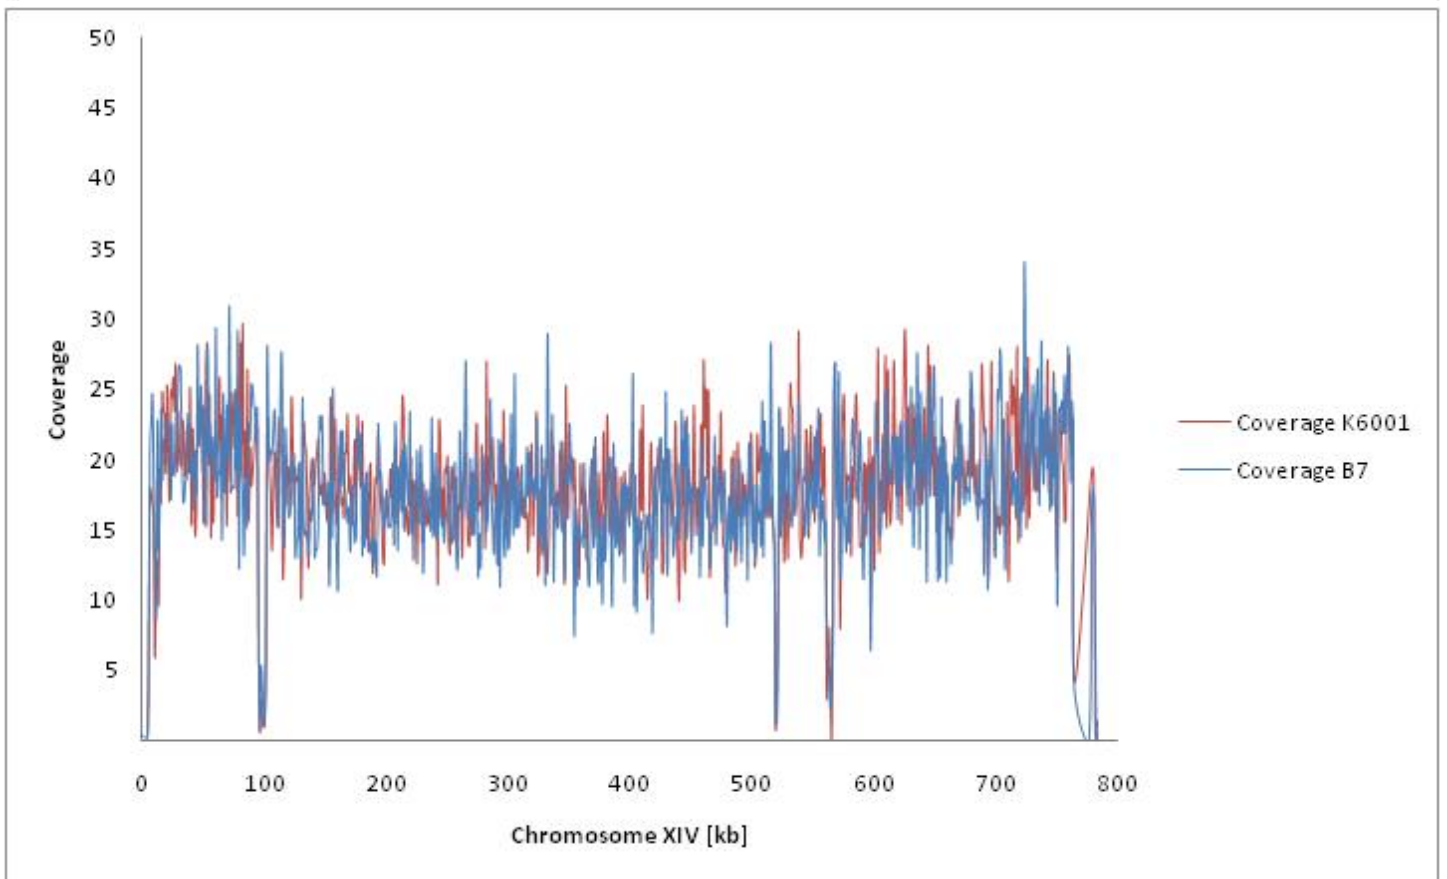

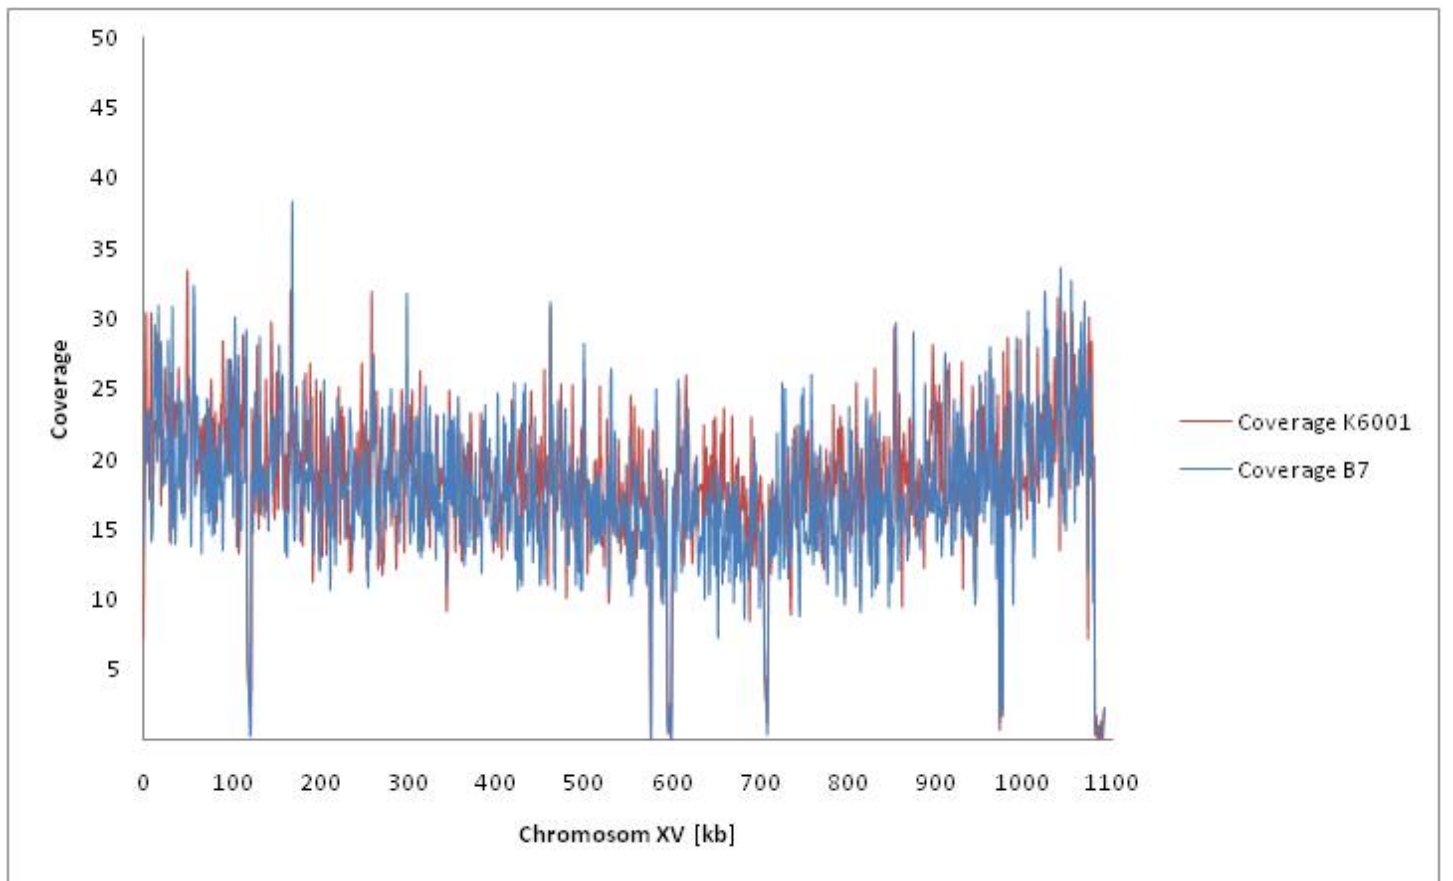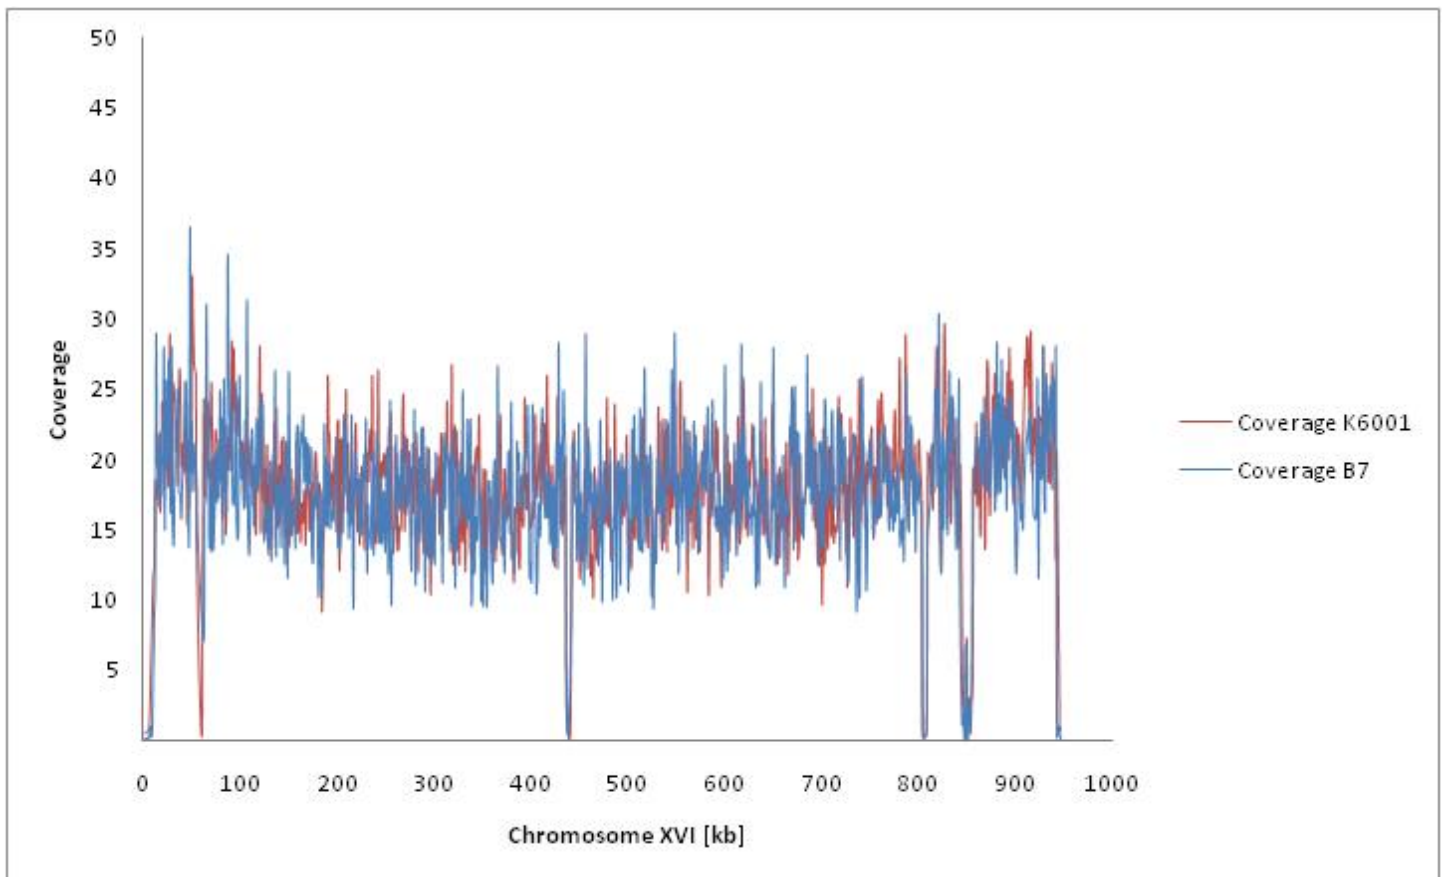

Supplement: Supplementary file [file aging-v2i8-100187-supplementary-material-SF1.pdf]
