# Supplementary material for: A new dominant peroxiredoxin allele identified by whole-genome re-sequencing of random mutagenized yeast causes oxidant-resistance and premature aging
Source: publisher site journal article supplement (doi:10.18632/aging.100187), 2010-08-13

# Supplementary Figure S2

Chromosomal distribution of (a) total and (b) amino acid exchanging SNVs that distinguish the K6001 and S288c genomes

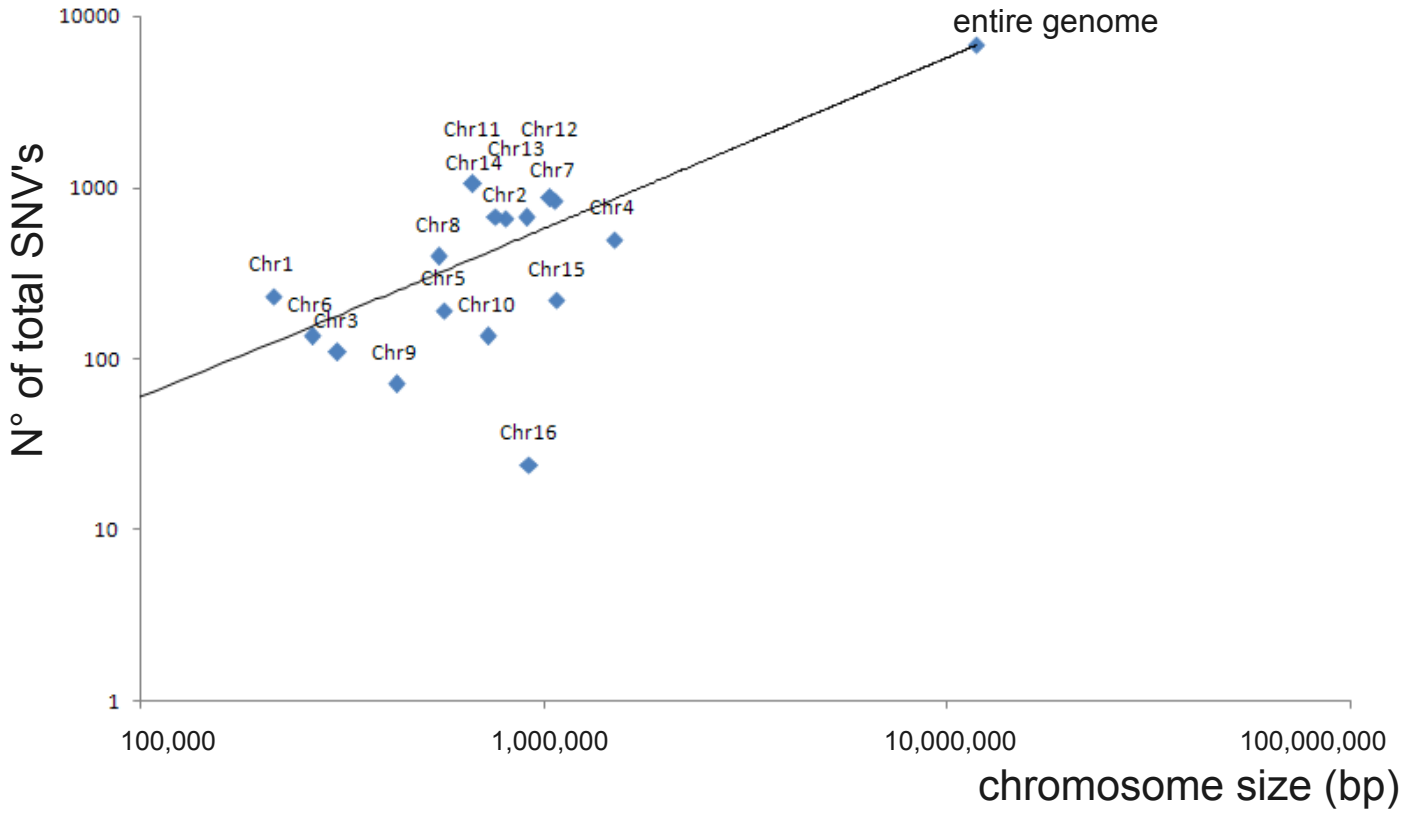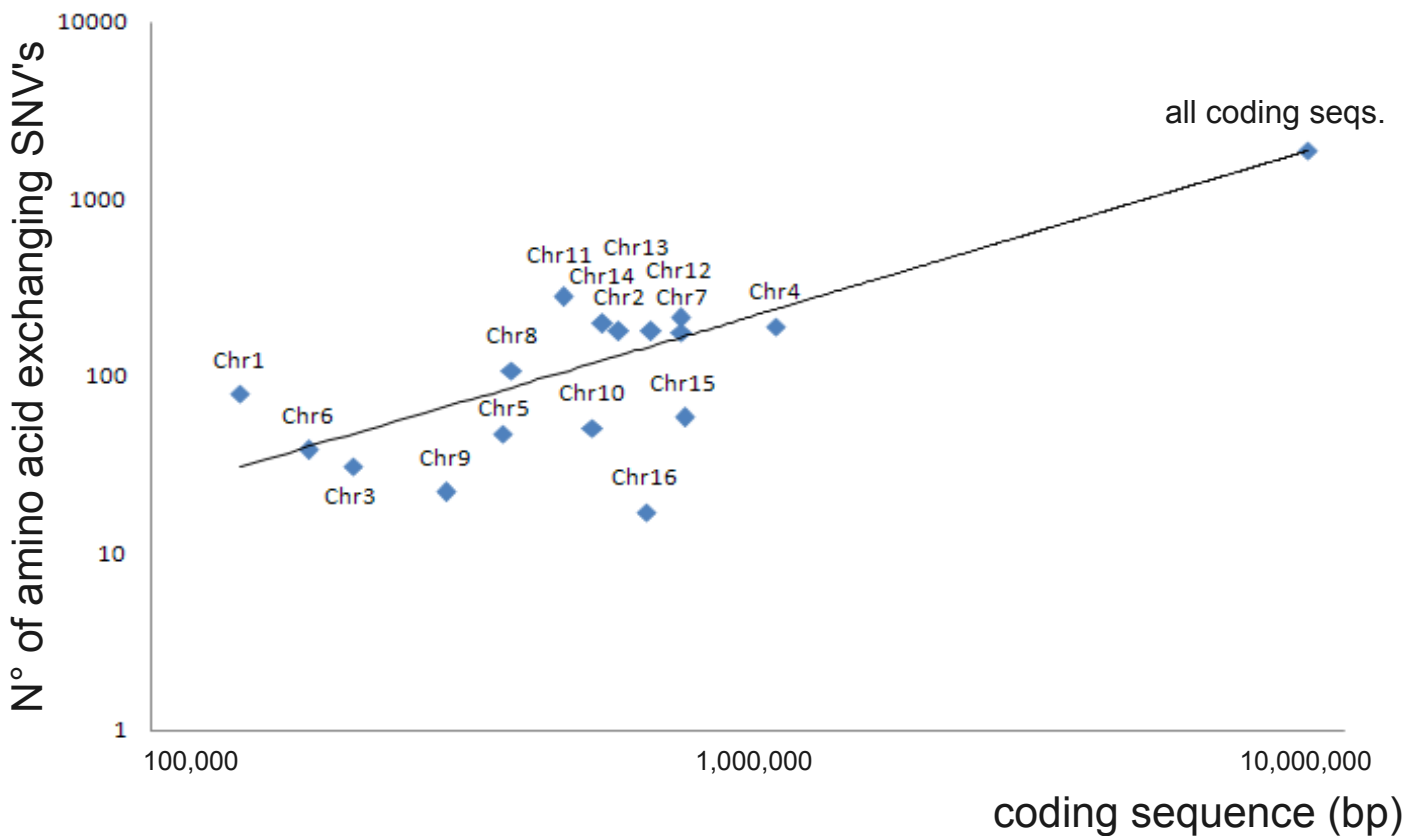

Supplement: Supplementary file [file aging-v2i8-100187-supplementary-material-SF2.pdf]
